# Supplementary material for: Quantum molecular simulations of micro-hydrated halogen anions
Source: Royal Society of Chemistry journal article supplement (doi:10.1039/d2cp01396g), 2022-01-01
Supplement: d2cp01396g1.pdf [file d2cp01396g1.pdf]

# Quantum molecular simulations of micro-hydrated halogen anions

Raúl Rodríguez-Segundo<sup>a,b</sup>, Alfonso Gijón,<sup>c</sup> and Rita Prosimi<sup>\*a\*</sup>

<sup>a</sup> *Institute of Fundamental Physics (IFF-CSIC), CSIC, Serrano 123, 28006 Madrid, Spain*

<sup>b</sup> *Atelgraphics S.L., Mota de Cuervo 42, 28043 Madrid, Spain*

<sup>c</sup> *Material Science Institute of Madrid (ICMM-CSIC), CSIC, Sor Juana Inés de la Cruz 3,  
28049 Madrid, Spain*

E-mail: rita@iff.csic.es

Supplementary material

Table S1 Energies (in kcal/mol) of low-lying structures of the indicated  $X^-(H_2O)_{N=1-8}$  halide-water clusters, obtained from optimization of the i-TTM4 PESs.

| $X^-/N$ | 1       | 2       | 3                                                   | 4                                                                                               | 5                                                                                                             | 6                                                                                                          | 7                                                                                                                                | 8                                                                                                      |
|---------|---------|---------|-----------------------------------------------------|-------------------------------------------------------------------------------------------------|---------------------------------------------------------------------------------------------------------------|------------------------------------------------------------------------------------------------------------|----------------------------------------------------------------------------------------------------------------------------------|--------------------------------------------------------------------------------------------------------|
| $F^-$   | -27.780 | -49.556 | -67.956<br>-67.073<br>-67.287<br>-66.505            | -85.360<br>-84.621<br>-80.262<br>-80.851<br>-83.565<br>-82.875<br>-82.213                       | -101.786<br>-101.158<br>-98.314<br>-99.475<br>-99.755<br>-99.612<br>-100.096<br>-98.239<br>-97.734<br>-97.975 | -115.668<br>-116.780<br>-115.864<br>-115.159<br>-113.976<br>-114.531<br>-114.389<br>-113.884<br>-113.576   | -130.003<br>-128.907<br>-127.862<br>-129.832                                                                                     | -142.461<br>-141.082<br>-140.959<br>-139.635<br>-139.168<br>-138.940<br>-140.142                       |
| $Cl^-$  | -14.974 | -30.037 | -46.230<br>-43.969<br>-44.235<br>-44.455            | -60.385<br>-58.008<br>-55.544<br>-56.323<br>-57.967<br>-61.082<br>-58.235                       | -75.465<br>-74.999<br>-75.263<br>-73.562<br>-74.702<br>-73.759<br>-74.339<br>-72.523<br>-73.990<br>-73.067    | -89.278<br>-88.244<br>-88.248<br>-88.454<br>-88.735<br>-87.310<br>-88.906<br>-86.725<br>-88.098<br>-87.034 | -99.804<br>-102.741<br>-102.098<br>-100.190<br>-99.551,<br>-97.659<br>-98.790<br>-101.633<br>-103.088                            | -115.358<br>-113.853<br>-111.882<br>-104.741<br>-111.744<br>-113.085<br>-111.734<br>-102.548           |
| $Br^-$  | -12.731 | -26.639 | -42.525<br>-39.861<br>-39.898                       | -56.268<br>-55.573<br>-53.740<br>-48.928<br>-51.714<br>-52.767<br>-56.071<br>-51.714<br>-51.891 | -70.580<br>-70.007<br>-68.588<br>-69.584<br>-69.114<br>-68.691<br>-67.739<br>-69.127<br>-68.503               | -83.645<br>-83.315<br>-83.998,<br>-83.321<br>-82.427<br>-82.773<br>-83.261<br>-81.555<br>-82.772           | -97.420<br>-94.089<br>-94.277<br>-91.675<br>-92.908<br>-96.210<br>-96.819<br>-97.330                                             | -107.781<br>-106.130<br>-99.544<br>-105.811<br>-107.904<br>-107.032<br>-109.030<br>-105.748<br>-96.981 |
| $I^-$   | -10.662 | -23.399 | -38.958<br>-35.855<br>-35.230<br>-35.422<br>-34.162 | -52.773<br>-50.778<br>-47.563<br>-49.505<br>-43.967<br>-47.321<br>-51.143<br>-50.677            | -65.783<br>-65.148<br>-63.066<br>-63.648<br>-63.369<br>-63.868<br>-62.533                                     | -79.142<br>-78.379<br>-78.544<br>-78.067<br>-78.866<br>-78.166<br>-77.581<br>-77.683<br>-76.381<br>-76.454 | -90.985<br>-87.469<br>-86.985<br>-91.183<br>-87.835<br>-81.707<br>-86.994<br>-87.634<br>-88.557<br>-88.696<br>-91.493<br>-90.765 | -103.38<br>-101.637<br>-99.673<br>-99.565<br>-103.410                                                  |

Table S2 Minimum potential energy, and average kinetic, potential and total energies (in kcal/mol) computed from the classical MD and PIMD calculations at T=10 K for each  $X^-(\text{H}_2\text{O})_{N=1-8}$  cluster using the i-TTM4 potentials. The anharmonic ZPE (in kcal/mol) values from PIMC simulations, and harmonic  $\mathcal{E}_{\text{ZPE(HA)}}$  estimates (in parenthesis) are also listed, in comparison with those from DMC calculations, <sup>a</sup> from ref. 45.

| N | $\text{F}^-(\text{H}_2\text{O})_N$  | MD                  |                     |                     | PIMD                |                     |                     |                                 |
|---|-------------------------------------|---------------------|---------------------|---------------------|---------------------|---------------------|---------------------|---------------------------------|
|   | $E_{\min}$                          | $\langle E \rangle$ | $\langle K \rangle$ | $\langle V \rangle$ | $\langle E \rangle$ | $\langle K \rangle$ | $\langle V \rangle$ | ZPE                             |
| 1 | -27.780                             | -27.4605±0.0006     | 0.1556±0.0002       | -27.6161±0.0003     | -12.58±0.02         | 7.49±0.02           | -20.073±0.007       | 15.20(15.58)/13.98 <sup>a</sup> |
| 2 | -49.556                             | -49.0333±0.0009     | 0.2554±0.0004       | -49.2887±0.0006     | -19.00±0.02         | 14.98±0.01          | -33.980±0.009       | 30.56(31.75)/29.45 <sup>a</sup> |
| 3 | -67.956                             | -67.2531±0.0007     | 0.3429±0.0004       | -67.5960±0.0005     | -21.62±0.02         | 22.67±0.01          | -44.29±0.01         | 46.33(48.46)/46.10 <sup>a</sup> |
| 4 | -85.360                             | -84.4757±0.0009     | 0.4320±0.0004       | -84.9077±0.0006     | -22.17±0.03         | 30.89±0.02          | -53.06±0.02         | 63.19(65.69)/62.21 <sup>a</sup> |
| 5 | -101.786                            | -100.727±0.001      | 0.5176±0.0004       | -101.2450±0.0006    | -22.64±0.03         | 38.63±0.02          | -61.27±0.02         | 79.15(82.66)/78.29 <sup>a</sup> |
| 6 | -116.780                            | -115.539±0.001      | 0.6067±0.0004       | -116.1457±0.0006    | -21.69±0.04         | 46.42±0.02          | -68.11±0.03         | 95.09(99.28)                    |
| 7 | -130.003                            | -128.572±0.001      | 0.6959±0.0005       | -129.2680±0.0009    | -18.79±0.05         | 54.34±0.02          | -73.14±0.03         | 111.21(116.10)                  |
| 8 | -142.461                            | -140.860±0.001      | 0.7840±0.0004       | -141.6443±0.0008    | -16.12±0.05         | 61.81±0.03          | -77.94±0.03         | 126.34(131.90)                  |
| N | $\text{Cl}^-(\text{H}_2\text{O})_N$ | MD                  |                     |                     | PIMD                |                     |                     |                                 |
|   | $E_{\min}$                          | $\langle E \rangle$ | $\langle K \rangle$ | $\langle V \rangle$ | $\langle E \rangle$ | $\langle K \rangle$ | $\langle V \rangle$ | ZPE                             |
| 1 | -14.974                             | -14.551±0.001       | 0.2054±0.0005       | -14.7566±0.0006     | -0.42±0.02          | 7.09±0.02           | -7.514±0.008        | 14.55(15.03)/14.33 <sup>a</sup> |
| 2 | -30.037                             | -29.4388±0.0009     | 0.2910±0.0004       | -29.7298±0.0005     | -0.24±0.02          | 14.53±0.01          | -14.77±0.01         | 29.80(31.13)/29.78 <sup>a</sup> |
| 3 | -46.230                             | -45.4739±0.0009     | 0.3693±0.0004       | -45.8432±0.0005     | -0.51±0.02          | 22.30±0.01          | -22.81±0.01         | 45.72(47.85)/46.05 <sup>a</sup> |
| 4 | -61.082                             | -60.1515±0.0009     | 0.4541±0.0004       | -60.6056±0.0006     | 0.95±0.03           | 30.29±0.02          | -29.34±0.02         | 62.03(64.56)/61.74 <sup>a</sup> |
| 5 | -75.465                             | -74.3703±0.0009     | 0.5354±0.0004       | -74.9057±0.0006     | 2.23±0.04           | 37.95±0.02          | -35.72±0.02         | 77.70(81.26)/77.60 <sup>a</sup> |
| 6 | -89.279                             | -88.0065±0.0009     | 0.6221±0.0004       | -88.6287±0.0006     | 4.18±0.05           | 45.63±0.02          | -41.44±0.03         | 93.46(97.68)                    |
| 7 | -103.088                            | -101.6405±0.001     | 0.7086±0.0005       | -102.3492±0.0006    | 7.35±0.05           | 53.93±0.02          | -46.58±0.03         | 110.44(115.27)                  |
| 8 | -115.358                            | -113.732±0.001      | 0.7953±0.0004       | -114.5270±0.0008    | 9.78±0.04           | 61.13±0.02          | -51.35±0.02         | 125.14(130.83)                  |
| N | $\text{Br}^-(\text{H}_2\text{O})_N$ | MD                  |                     |                     | PIMD                |                     |                     |                                 |
|   | $E_{\min}$                          | $\langle E \rangle$ | $\langle K \rangle$ | $\langle V \rangle$ | $\langle E \rangle$ | $\langle K \rangle$ | $\langle V \rangle$ | ZPE                             |
| 1 | -12.731                             | -12.030±0.002       | 0.3395±0.0008       | -12.3699±0.0009     | 1.79±0.02           | 6.97±0.02           | -5.17±0.01          | 14.52(14.87)/14.26 <sup>a</sup> |
| 2 | -26.639                             | -25.843±0.001       | 0.3871±0.0005       | -26.2298±0.0006     | 3.23±0.02           | 14.50±0.01          | -11.27±0.01         | 29.87(31.01)/29.70 <sup>a</sup> |
| 3 | -42.525                             | -41.620±0.001       | 0.4417±0.0005       | -42.0614±0.0007     | 3.38±0.03           | 22.33±0.01          | -18.96±0.02         | 45.91(47.91)/45.99 <sup>a</sup> |
| 4 | -56.268                             | -55.219±0.001       | 0.5117±0.0005       | -55.7311±0.0009     | 5.51±0.04           | 30.07±0.02          | -24.56±0.02         | 61.78(64.26)/61.75 <sup>a</sup> |
| 5 | -70.581                             | -69.385±0.001       | 0.5845±0.0005       | -69.9699±0.0008     | 6.84±0.04           | 37.75±0.02          | -30.91±0.02         | 77.42(80.95)/77.45 <sup>a</sup> |
| 6 | -83.998                             | -82.642±0.001       | 0.6632±0.0005       | -83.3055±0.0007     | 9.11±0.04           | 45.44±0.02          | -36.33±0.03         | 93.11(97.40)                    |
| 7 | -97.420                             | -95.901±0.001       | 0.7440±0.0005       | -96.6450±0.0008     | 11.32±0.05          | 53.19±0.02          | -41.88±0.03         | 108.74(113.64)                  |
| 8 | -109.030                            | -107.339±0.001      | 0.8275±0.0005       | -108.1664±0.0009    | 15.77±0.05          | 61.01±0.02          | -45.24±0.04         | 124.80(130.25)                  |
| N | $\text{I}^-(\text{H}_2\text{O})_N$  | MD                  |                     |                     | PIMD                |                     |                     |                                 |
|   | $E_{\min}$                          | $\langle E \rangle$ | $\langle K \rangle$ | $\langle V \rangle$ | $\langle E \rangle$ | $\langle K \rangle$ | $\langle V \rangle$ | ZPE                             |
| 1 | -10.662                             | -9.632±0.002        | 0.496±0.001         | -10.128±0.001       | 3.74±0.03           | 6.79±0.02           | -3.05±0.02          | 14.40(14.70)/14.12 <sup>a</sup> |
| 2 | -23.399                             | -22.388±0.002       | 0.4910±0.0008       | -22.8792±0.0009     | 6.33±0.02           | 14.40±0.01          | -8.07±0.02          | 29.72(30.87)/29.59 <sup>a</sup> |
| 3 | -38.958                             | -37.895±0.001       | 0.5182±0.0006       | -38.4133±0.0007     | 7.07±0.03           | 22.31±0.01          | -15.23±0.02         | 46.03(47.94)/45.92 <sup>a</sup> |
| 4 | -52.773                             | -51.600±0.001       | 0.5727±0.0006       | -52.1725±0.0009     | 9.35±0.04           | 30.22±0.02          | -20.87±0.02         | 62.12(64.42)/61.69 <sup>a</sup> |
| 5 | -65.783                             | -64.485±0.001       | 0.6344±0.0005       | -65.1199±0.0007     | 11.63±0.04          | 37.71±0.02          | -26.08±0.03         | 77.41(80.76)/77.21 <sup>a</sup> |
| 6 | -79.142                             | -77.696±0.001       | 0.7074±0.0006       | -78.4029±0.0009     | 13.93±0.05          | 45.40±0.02          | -31.47±0.03         | 93.07(97.20)                    |
| 7 | -91.494                             | -89.896±0.001       | 0.7811±0.0006       | -90.6775±0.0008     | 18.12±0.05          | 53.48±0.02          | -35.35±0.03         | 109.61(114.42)                  |
| 8 | -103.410                            | -101.649±0.001      | 0.8611±0.0005       | -102.5101±0.0008    | 21.00±0.05          | 60.82±0.02          | -39.82±0.03         | 124.41(129.96)                  |

Table S3 Comparison of anharmonic ZPE values (in kcal/mol) obtained from the present PIMD simulations at T=10 K with those reported previously from DMC and variational quantum calculations. <sup>a</sup> ref. 55, <sup>b</sup> ref. 60, <sup>c</sup> ref. 44, <sup>d</sup> ref. 61, <sup>e</sup> ref. 45, <sup>f</sup> ref. 84, <sup>g</sup> ref. 85, <sup>h</sup> ref. 86.

| PES/Method                                  | F <sup>-</sup> (H <sub>2</sub> O) | Cl <sup>-</sup> (H <sub>2</sub> O) | Br <sup>-</sup> (H <sub>2</sub> O) | I <sup>-</sup> (H <sub>2</sub> O) |
|---------------------------------------------|-----------------------------------|------------------------------------|------------------------------------|-----------------------------------|
| i-TTM4 <sup>a</sup> /PIMD-This work         | 15.20                             | 14.55                              | 14.52                              | 14.40                             |
| TTM-ngr <sup>b</sup> /RV4 code <sup>c</sup> | 15.40                             | 14.73                              | 14.57                              | 14.39                             |
| MB-ngr <sup>d</sup> /RV4 code <sup>c</sup>  | 14.80                             | 14.48                              | 14.36                              | 14.20                             |
| MB-ngr <sup>d</sup> /DMC <sup>e</sup>       | 13.98                             | 14.33                              | 14.26                              | 14.12                             |
| SLBCL/GENIUSH code <sup>f</sup>             | 13.81                             | –                                  | –                                  | –                                 |
| RB <sup>g</sup> /QC <sup>g,h</sup>          | –                                 | 14.36                              | –                                  | –                                 |

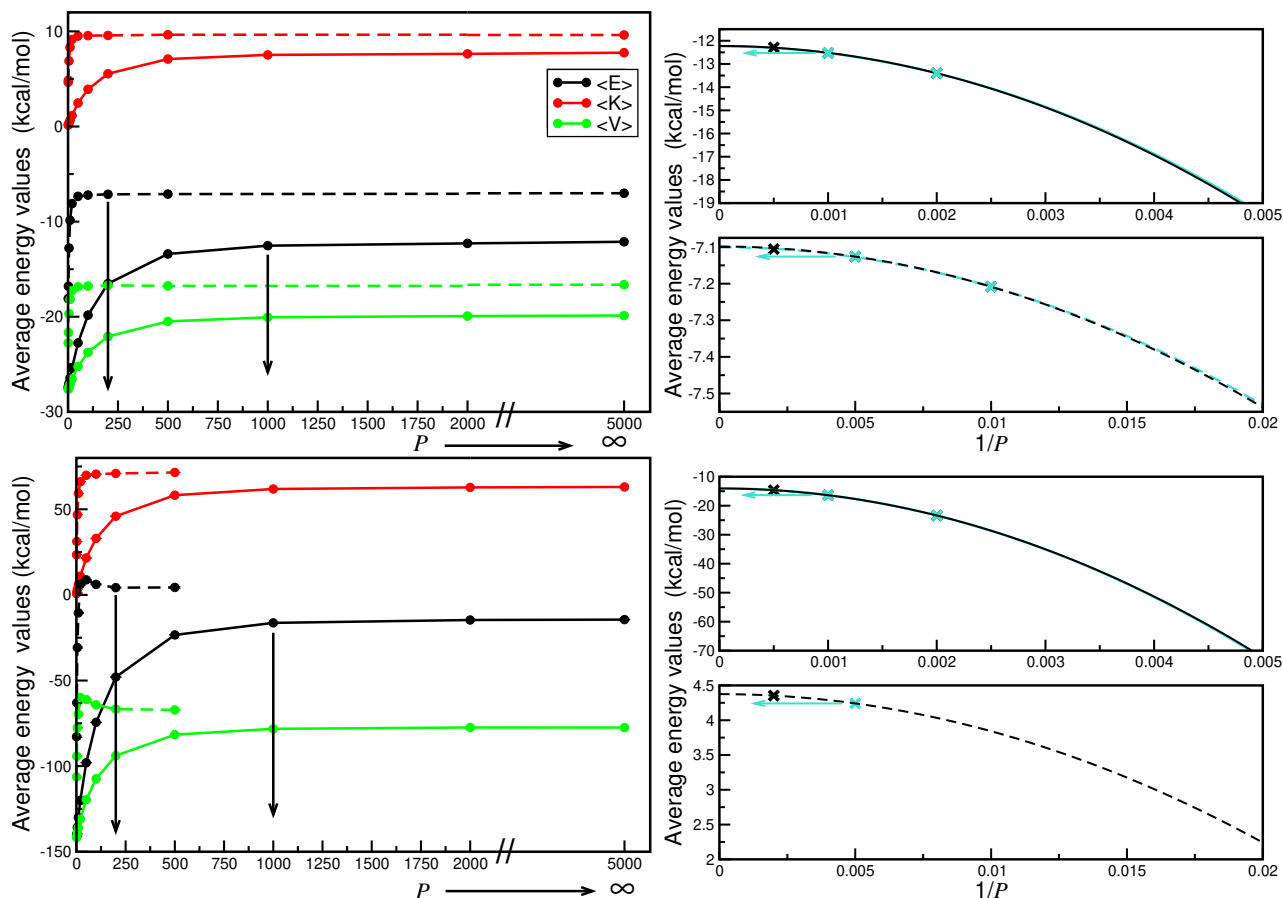

Fig. S1 Convergence of kinetic ( $\langle K \rangle$ ), potential ( $\langle V \rangle$ ), and total ( $\langle E \rangle$ ) energy as a function of the number of replicas ( $\mathcal{P}$ ) (left panels), and extrapolation of the total energy in the  $\mathcal{P} \rightarrow \infty$  limit (right panels), from the PIMD simulations for F<sup>-</sup>(H<sub>2</sub>O)<sub>N</sub> with N = 1 (upper panel) and 8 (lower panel at T = 10 and 300 K (see solid and dashed lines, respectively)).

Table S4 Average kinetic, potential and total energies (in kcal/mol) computed from the classical MD and PIMD calculations at T=300 K for each  $X^-(H_2O)_N$  cluster using the i-TTM4 potentials.

| $F^-(H_2O)_N$  | MD                  |                     |                     | PIMD                |                     |                     |
|----------------|---------------------|---------------------|---------------------|---------------------|---------------------|---------------------|
|                | $\langle E \rangle$ | $\langle K \rangle$ | $\langle V \rangle$ | $\langle E \rangle$ | $\langle K \rangle$ | $\langle V \rangle$ |
| 1              | -18.09±0.03         | 4.66±0.02           | -22.75±0.02         | -7.10±0.05          | 9.580±0.008         | -16.74±0.05         |
| 2              | -33.89±0.04         | 7.67±0.02           | -41.56±0.03         | -11.22±0.06         | 18.22±0.01          | -29.52±0.06         |
| 3              | -45.10±0.07         | 10.28±0.02          | -55.38±0.06         | -10.61±0.09         | 26.92±0.02          | -37.6±0.1           |
| 4              | -53.6±0.1           | 12.99±0.02          | -66.6±0.1           | -6.6±0.2            | 35.71±0.03          | -42.9±0.2           |
| 5              | -61.8±0.2           | 15.54±0.02          | -77.34±0.2          | -3.1±0.3            | 44.21±0.03          | -47.5±0.3           |
| 6              | -68.5±0.2           | 18.20±0.02          | -86.7±0.2           | 0.2±0.3             | 53.14±0.03          | -52.8±0.3           |
| 7              | -75.8±0.3           | 20.86±0.02          | -96.7±0.3           | 4.1±0.3             | 61.89±0.02          | -58.00±0.2          |
| 8              | -84.3±0.4           | 23.46±0.06          | -107.7±0.4          | 9.1±0.3             | 70.90±0.06          | -61.8±0.3           |
| $Cl^-(H_2O)_N$ | MD                  |                     |                     | PIMD                |                     |                     |
|                | $\langle E \rangle$ | $\langle K \rangle$ | $\langle V \rangle$ | $\langle E \rangle$ | $\langle K \rangle$ | $\langle V \rangle$ |
| 1              | -1.9±0.1            | 6.15±0.06           | -8.05±0.09          | 7.3±0.2             | 9.34±0.03           | -2.0±0.3            |
| 2              | -10.8±0.1           | 8.80±0.06           | -19.60±0.08         | 9.1±0.2             | 18.02±0.03          | -8.9±0.2            |
| 3              | -18.5±0.2           | 11.21±0.06          | -29.7±0.1           | 12.3±0.2            | 26.68±0.04          | -14.4±0.2           |
| 4              | -25.8±0.2           | 13.74±0.06          | -39.5±0.2           | 15.3±0.3            | 35.62±0.05          | -20.4±0.3           |
| 5              | -31.5±0.3           | 16.19±0.06          | -47.7±0.2           | 22.9±0.4            | 43.89±0.05          | -21.0±0.4           |
| 6              | -38.1±0.3           | 18.72±0.07          | -56.8±0.3           | 27.5±0.3            | 52.63±0.05          | -25.1±0.3           |
| 7              | -44.8±0.4           | 21.29±0.06          | -66.1±0.4           | 28.7±0.3            | 61.54±0.06          | -32.9±0.3           |
| 8              | -51.8±0.5           | 23.96±0.06          | -75.8±0.5           | 32.7±0.3            | 70.40±0.06          | -37.7±0.3           |
| $Br^-(H_2O)_N$ | MD                  |                     |                     | PIMD                |                     |                     |
|                | $\langle E \rangle$ | $\langle K \rangle$ | $\langle V \rangle$ | $\langle E \rangle$ | $\langle K \rangle$ | $\langle V \rangle$ |
| 1              | 11.5±0.4            | 10.01±0.09          | 1.4±0.4             | 13.3±0.3            | 9.19±0.03           | 4.2±0.3             |
| 2              | 2.3±0.4             | 11.87±0.07          | -9.5±0.4            | 15.4±0.2            | 17.91±0.03          | -2.5±0.2            |
| 3              | -9.1±0.2            | 13.43±0.09          | -22.6±0.2           | 18.5±0.2            | 26.56±0.04          | -8.0±0.2            |
| 4              | -16.0±0.2           | 15.65±0.07          | -31.7±0.2           | 22.0±0.4            | 35.47±0.04          | -13.5±0.4           |
| 5              | -20.7±0.4           | 17.71±0.06          | -38.5±0.4           | 29.5±0.4            | 43.78±0.05          | -14.30±0.4          |
| 6              | -30.3±0.3           | 19.91±0.07          | -50.2±0.3           | 34.9±0.3            | 52.43±0.05          | -17.5±0.3           |
| 7              | -34.6±0.4           | 22.42±0.06          | -57.0±0.4           | 38.1±0.3            | 61.29±0.06          | -23.2±0.3           |
| 8              | -40.6±0.5           | 24.95±0.07          | -65.6±0.4           | 40.0±0.4            | 70.25±0.06          | -30.3±0.4           |
| $I^-(H_2O)_N$  | MD                  |                     |                     | PIMD                |                     |                     |
|                | $\langle E \rangle$ | $\langle K \rangle$ | $\langle V \rangle$ | $\langle E \rangle$ | $\langle K \rangle$ | $\langle V \rangle$ |
| 1              | 21.9±0.2            | 13.93±0.05          | 8.0±0.2             | 21.1±0.2            | 9.01±0.01           | 12.1±0.2            |
| 2              | 13.4±0.4            | 14.70±0.04          | -1.3±0.4            | 23.0±0.2            | 17.62±0.01          | 5.4±0.2             |
| 3              | 2.3±0.3             | 15.88±0.03          | -13.6±0.3           | 28.4±0.2            | 26.13±0.01          | 2.3±0.2             |
| 4              | 0.5±0.6             | 17.38±0.03          | -16.9±0.6           | 33.2±0.3            | 34.97±0.02          | -1.8±0.4            |
| 5              | -13.0±0.2           | 19.18±0.03          | -32.2±0.2           | 37.5±0.3            | 43.54±0.02          | -6.0±0.3            |
| 6              | -19.5±0.3           | 21.31±0.03          | -40.8±0.3           | 43.2±0.4            | 52.15±0.03          | -9.0±0.4            |
| 7              | -25.2±0.3           | 23.58±0.02          | -48.8±0.3           | 47.2±0.6            | 60.88±0.04          | -13.7±0.6           |
| 8              | -32.5±0.4           | 25.87±0.02          | -58.3±0.4           | 52.8±0.3            | 69.57±0.03          | -16.8±0.3           |

Table S5 Average total, kinetic and potential energies (in kcal/mol) computed from the classical MD and PIMD calculations at T=10 K for each  $X^- \cdots (H_2O)_{N=1-8}$  system using the i-TTM4 potentials.

| N | MD ( $X^- \cdots (H_2O)_N$ ) |                     |                     | PIMD ( $X^- \cdots (H_2O)_N$ ) |                     |                     |
|---|------------------------------|---------------------|---------------------|--------------------------------|---------------------|---------------------|
|   | $\langle E \rangle$          | $\langle K \rangle$ | $\langle V \rangle$ | $\langle E \rangle$            | $\langle K \rangle$ | $\langle V \rangle$ |
| 1 | 0.2540±0.0007                | 0.1559±0.0004       | 0.0981±0.0003       | 12.96±0.02                     | 6.38±0.02           | 6.588±0.002         |
| 2 | -4.4914±0.0008               | 0.2541±0.0004       | -4.7455±0.0005      | 22.73±0.02                     | 13.48±0.01          | 9.252±0.008         |
| 3 | -14.2633±0.0008              | 0.3410±0.0004       | -14.6043±0.0005     | 28.86±0.02                     | 21.23±0.01          | 7.63±0.01           |
| 4 | -26.3398±0.0008              | 0.4311±0.0004       | -26.7709±0.0005     | 32.85±0.02                     | 29.24±0.01          | 3.61±0.01           |
| 5 | -34.810±0.001                | 0.5167±0.0004       | -35.3263±0.0008     | 38.57±0.03                     | 36.34±0.02          | 2.23±0.02           |
| 6 | -44.929±0.001                | 0.6051±0.0005       | -45.5345±0.0008     | 44.87±0.03                     | 44.33±0.02          | 0.54±0.02           |
| 7 | -56.987±0.001                | 0.6943±0.0005       | -57.6814±0.0007     | 48.67±0.05                     | 52.25±0.02          | -3.58±0.04          |
| 8 | -66.078±0.001                | 0.7830±0.0005       | -66.8608±0.0009     | 54.53±0.04                     | 59.67±0.02          | -5.15±0.03          |

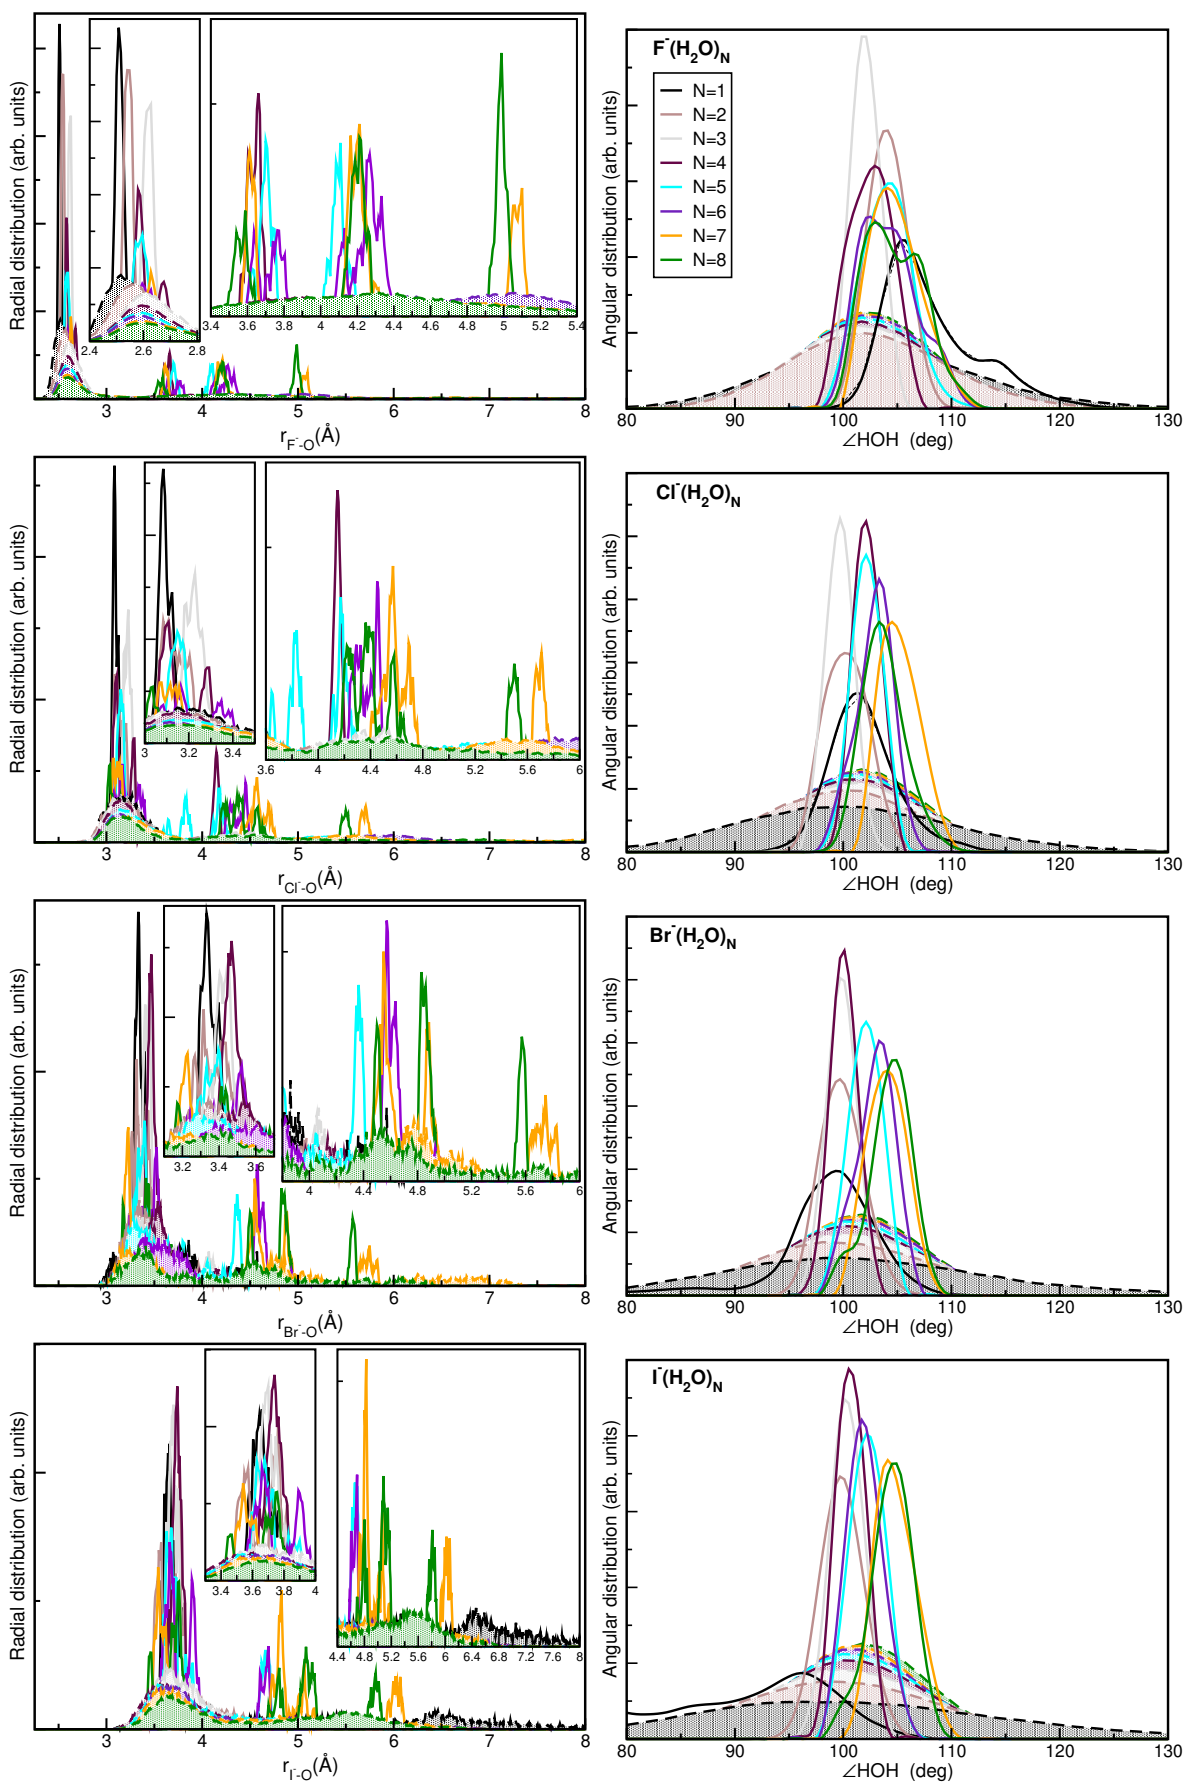

Fig. S2 Radial (left panel) and angular (right panel) distributions from the PIMD simulations for the indicated  $X^-(H_2O)_n$  with  $n = 1$  to  $8$  water molecules ( $X = F-I$  from upper to lower panels) at  $T = 10$  (solid lines) and  $300$  K (dashed lines and shadow/pattern curves).

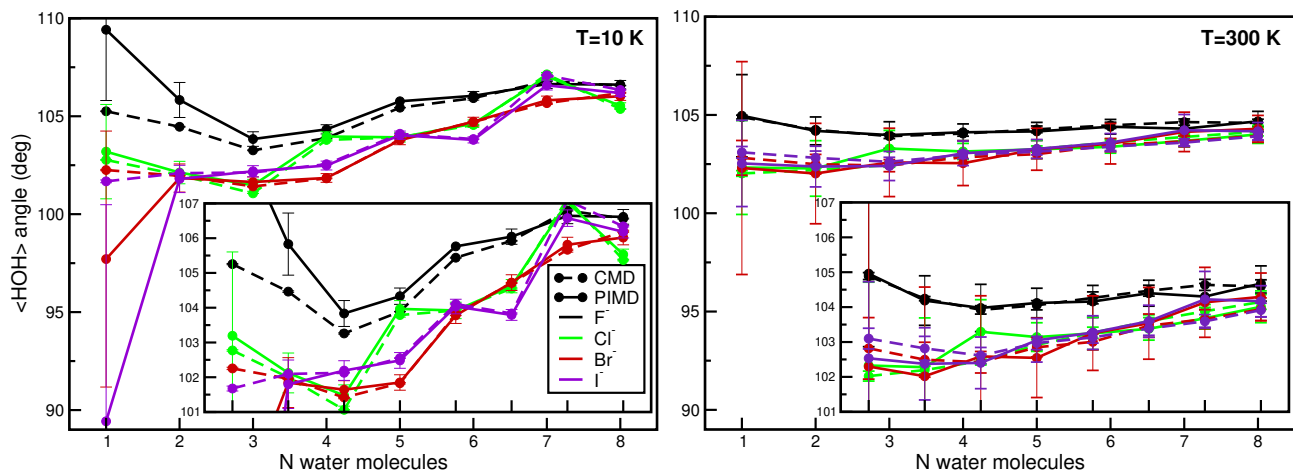

Fig. S3 Dependence of mean  $\langle \text{HOH} \rangle$  angle values in the  $\text{X}^-(\text{H}_2\text{O})_N$  clusters, with  $\text{X}=\text{F}^-$ ,  $\text{Cl}^-$ ,  $\text{Br}^-$ , and  $\text{I}^-$ , from PIMD (solid lines) and classical MD (dashed lines) simulations at the indicated temperatures, as the number of the  $N$  water molecules increases.



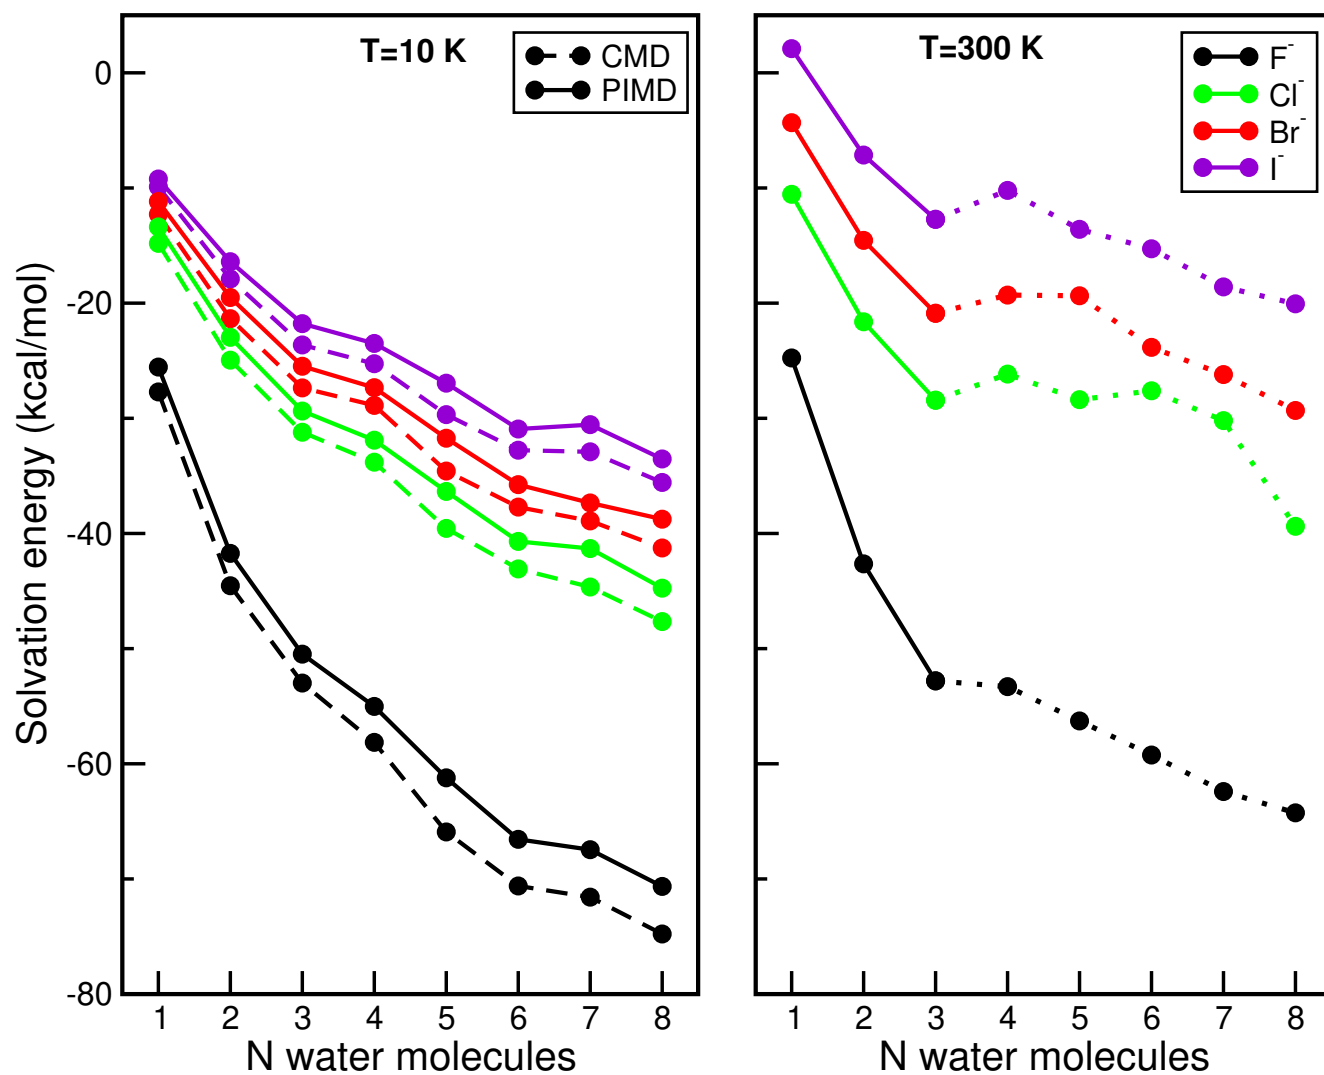

Fig. S4 Ion-cluster solvation energies as a function of the cluster size  $N$  from classical MD (dashed lines) and PIMD (solid lines) calculations at  $T=10$  and  $300$  K for the indicated  $X^-(\text{H}_2\text{O})_N$  clusters.
